# Supplementary material
Source: publisher figshare collection journal article supplement (https://acs.figshare.com/ndownloader/files/26441880)
Supplement: Supplementary file 1 [file 26441880]

## **Supporting Information**

### **Ginnalin A Binds to the Sub-Pockets of Keap1 Kelch Domain to Activate the Nrf2-Regulated Antioxidant Defense System in SH-SY5Y Cells**

**Zhuang Zhang, Lanlan Peng, Yaru Fu\*, Wenjuan Wang, Pengcheng Wang, Feimeng Zhou\***

Institute of Surface Analysis and Chemical Biology, University of Jinan, Jinan,  
Shandong 250022, P. R. China

#### **\*Corresponding Authors**

\*Y.R. Fu: mse\_fuyr@ujn.edu.cn

\*F.M. Zhou: ila\_zhoufm@ujn.edu.cn

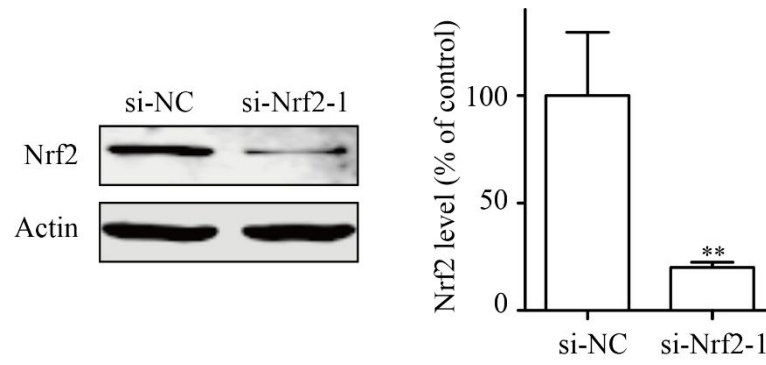

**Figure S1.** Left: Representative western blots of Nrf2, with actin as the loading control, in SH-SY5Y cells (si-NC) and in those transfected with si-Nrf2-1. Right: the Nrf2 protein level in the si-Nrf2-1 cells relative to that in the si-NC cells.

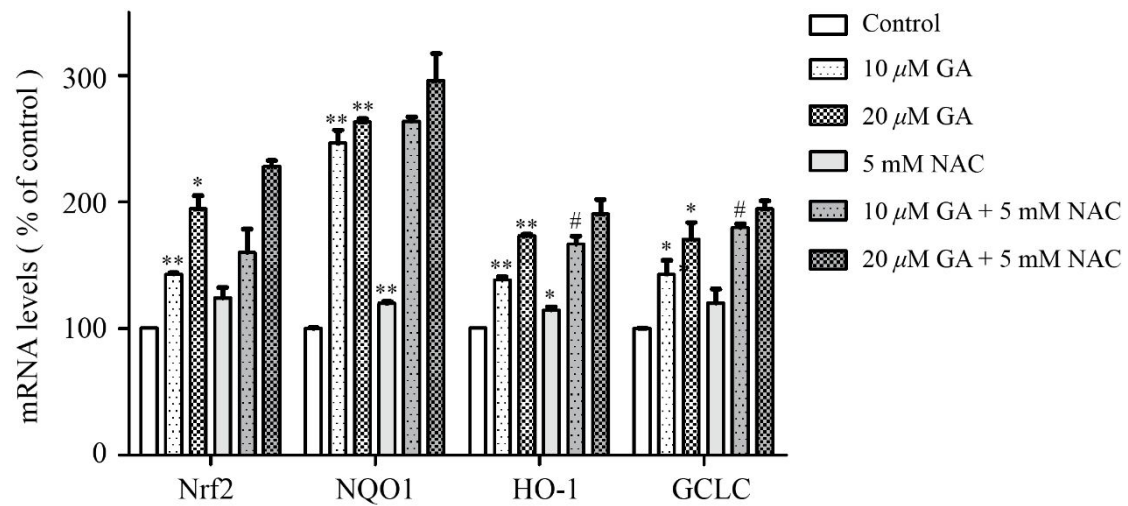

**Figure S2.** Normalized Nrf2, NQO1, HO-1, and GCLC mRNA levels in SH-SY5Y cells pretreated with 10 and 20  $\mu$ M GA with respect to the control group. Data from co-treatments of cells with 5 mM NAC are also shown. Results are presented as mean  $\pm$  SD from three replicates (\* $p < 0.05$  and \*\* $p < 0.01$  vs. the control group and # $p < 0.05$  vs. the 10- $\mu$ M GA group).
